# Supplementary material
Source: MDPI journal article supplement (https://www.mdpi.com/2076-3417/11/23/11120)
Supplement: s1 [file s1]

## Article

# Exploring Serum NMR-Based Metabolomic Fingerprint of Colorectal Cancer Patients: Effects of Surgery and Possible Associations with Cancer Relapse

Alessia Vignoli<sup>1,2,†</sup>, Elena Mori<sup>3,†</sup>, Samantha Di Donato<sup>3</sup>, Luca Malorni<sup>3,4</sup>, Chiara Biagioni<sup>5</sup>, Matteo Benelli<sup>5</sup>, Vanessa Calamai<sup>3</sup>, Stefano Cantafio<sup>6</sup>, Annamaria Parnofiello<sup>3,7</sup>, Maddalena Baraghini<sup>6</sup>, Alessia Garzi<sup>6</sup>, Francesca Del Monte<sup>3</sup>, Dario Romagnoli<sup>5</sup>, Ilenia Migliaccio<sup>4</sup>, Claudio Luchinat<sup>1,2</sup>, Leonardo Tenori<sup>1,2,†,\*</sup>, and Laura Biganzoli<sup>3,†,\*</sup>

**Table S1.** Data completeness for the different metabolites quantified in the serum samples analyzed via NMR. LOQ = limit of quantification.

| Metabolite            | Levels outside the measurable range (%) | LOQ (mmol/L) | 95% Range (mmol/L) |
|-----------------------|-----------------------------------------|--------------|--------------------|
| Alanine               | 0                                       | < 0.02       | 0.64 - 0.29        |
| Creatine              | 0                                       | < 0.01       | ≤ 0.07             |
| Creatinine            | 0                                       | < 0.01       | 0.14 - 0.06        |
| Glutamine             | 0                                       | < 0.02       | 0.83 - 0.3         |
| Glycine               | 0                                       | < 0.01       | 0.44 - 0.17        |
| Histidine             | 0                                       | < 0.02       | 0.16 - 0.07        |
| Isoleucine            | 0                                       | < 0.03       | 0.11 - 0.03        |
| Leucine               | 0                                       | < 0.01       | 0.2 - 0.07         |
| N,N-Dimethylglycine   | 1.2                                     | < 0.01       | ≤ 0.01             |
| Phenylalanine         | 0                                       | < 0.03       | ≤ 0.07             |
| Tyrosine              | 0                                       | < 0.03       | ≤ 0.08             |
| Valine                | 0                                       | < 0.03       | 0.35 - 0.15        |
| Acetic acid           | 0                                       | < 0.01       | ≤ 0.06             |
| Citric acid           | 0                                       | < 0.03       | ≤ 0.21             |
| Formic acid           | 0                                       | < 0.02       | ≤ 0.03             |
| Lactic acid           | 0                                       | < 0.03       | 7.14 - 2.23        |
| Succinic acid         | 4.8                                     | < 0.01       | ≤ 0.01             |
| 3-Hydroxybutyric acid | 20.2                                    | < 0.02       | ≤ 0.26             |
| Acetoacetic acid      | 10.7                                    | < 0.01       | ≤ 0.02             |
| Acetone               | 0                                       | < 0.01       | ≤ 0.06             |
| Pyruvic acid          | 8.3                                     | < 0.03       | ≤ 0.07             |
| Glucose               | 0                                       | < 0.54       | 6.08 - 1.73        |
| Dimethyl sulfone      | 0                                       | < 0.01       | ≤ 0.02             |

**Table S2.** Correlation between clinical data and metabolites. Correlation coefficients and p-values are reported in table.

| Metabolite            | pT     |       | N      |       | GRADE  |       | STAGE  |       | LOCALIZATION |       | SEX    |                         | ECOG PS |       |
|-----------------------|--------|-------|--------|-------|--------|-------|--------|-------|--------------|-------|--------|-------------------------|---------|-------|
|                       | r      | p     | r      | p     | r      | p     | r      | p     | r            | p     | r      | p                       | r       | p     |
| Alanine               | -0.151 | 0.203 | 0.069  | 0.592 | -0.074 | 0.547 | 0.042  | 0.738 | -0.097       | 0.384 | 0.049  | 0.663                   | -0.129  | 0.365 |
| Creatine              | 0.061  | 0.619 | 0.131  | 0.300 | 0.191  | 0.103 | 0.027  | 0.835 | -0.098       | 0.381 | -0.280 | 0.011                   | 0.139   | 0.295 |
| Creatinine            | -0.047 | 0.691 | 0.141  | 0.231 | 0.067  | 0.581 | 0.248  | 0.093 | 0.034        | 0.762 | 0.385  | 3.566·10 <sup>-04</sup> | 0.104   | 0.434 |
| Glutamine             | -0.103 | 0.394 | -0.034 | 0.809 | -0.151 | 0.210 | -0.167 | 0.159 | -0.035       | 0.755 | -0.225 | 0.042                   | 0.072   | 0.604 |
| Glycine               | -0.226 | 0.048 | -0.028 | 0.830 | -0.027 | 0.829 | -0.191 | 0.119 | -0.137       | 0.220 | -0.319 | 0.003                   | -0.061  | 0.667 |
| Histidine             | -0.322 | 0.003 | -0.070 | 0.601 | -0.179 | 0.134 | -0.236 | 0.050 | -0.071       | 0.529 | 0.124  | 0.269                   | -0.110  | 0.462 |
| Isoleucine            | 0.071  | 0.563 | 0.157  | 0.217 | -0.015 | 0.905 | 0.292  | 0.015 | 0.102        | 0.362 | 0.250  | 0.024                   | -0.253  | 0.098 |
| Leucine               | 0.065  | 0.595 | 0.084  | 0.526 | -0.162 | 0.176 | 0.060  | 0.637 | 0.116        | 0.298 | 0.223  | 0.045                   | -0.248  | 0.063 |
| N,N-Dimethylglycine   | 0.063  | 0.605 | -0.026 | 0.845 | 0.093  | 0.447 | 0.075  | 0.542 | -0.029       | 0.795 | 0.171  | 0.125                   | 0.263   | 0.034 |
| Phenylalanine         | 0.066  | 0.591 | 0.071  | 0.597 | 0.022  | 0.861 | 0.162  | 0.177 | -0.040       | 0.722 | 0.142  | 0.204                   | -0.142  | 0.293 |
| Tyrosine              | -0.178 | 0.134 | -0.390 | 0.001 | -0.117 | 0.336 | -0.291 | 0.008 | 0.021        | 0.853 | -0.096 | 0.391                   | -0.234  | 0.092 |
| Valine                | 0.026  | 0.831 | 0.056  | 0.675 | -0.102 | 0.406 | 0.104  | 0.397 | 0.073        | 0.513 | 0.160  | 0.151                   | -0.372  | 0.002 |
| Acetic acid           | 0.029  | 0.816 | -0.116 | 0.555 | 0.096  | 0.425 | -0.013 | 0.908 | 0.188        | 0.091 | 0.141  | 0.208                   | -0.442  | 0.571 |
| Citric acid           | -0.010 | 0.934 | 0.179  | 0.157 | -0.223 | 0.055 | 0.110  | 0.378 | -0.032       | 0.777 | -0.013 | 0.910                   | -0.002  | 0.991 |
| Formic acid           | 0.154  | 0.205 | 0.174  | 0.174 | 0.153  | 0.200 | 0.196  | 0.139 | -0.045       | 0.687 | 0.232  | 0.036                   | -0.096  | 0.458 |
| Lactic acid           | 0.019  | 0.879 | 0.112  | 0.387 | 0.075  | 0.536 | 0.145  | 0.251 | 0.134        | 0.230 | 0.161  | 0.148                   | -0.087  | 0.514 |
| Succinic acid         | 0.139  | 0.250 | 0.052  | 0.685 | 0.008  | 0.946 | 0.139  | 0.268 | 0.139        | 0.212 | -0.005 | 0.964                   | 0.122   | 0.363 |
| 3-Hydroxybutyric acid | 0.104  | 0.394 | 0.097  | 0.442 | -0.033 | 0.787 | 0.164  | 0.216 | 0.044        | 0.693 | 0.010  | 0.932                   | 0.170   | 0.187 |
| Acetoacetic acid      | 0.001  | 0.994 | 0.024  | 0.847 | 0.007  | 0.954 | 0.073  | 0.568 | 0.115        | 0.302 | -0.027 | 0.807                   | 0.144   | 0.268 |
| Acetone               | 0.035  | 0.780 | 0.002  | 0.989 | -0.029 | 0.814 | 0.123  | 0.356 | 0.218        | 0.049 | 0.048  | 0.668                   | -0.163  | 0.357 |
| Pyruvic acid          | -0.043 | 0.722 | 0.016  | 0.905 | 0.156  | 0.196 | 0.020  | 0.875 | -0.032       | 0.778 | 0.013  | 0.910                   | 0.027   | 0.850 |
| Glucose               | -0.097 | 0.420 | 0.114  | 0.372 | -0.125 | 0.301 | 0.113  | 0.362 | -0.049       | 0.661 | -0.033 | 0.766                   | 0.049   | 0.714 |
| Dimethylsulfone       | -0.183 | 0.115 | 0.130  | 0.267 | 0.044  | 0.717 | 0.165  | 0.247 | 0.081        | 0.467 | 0.063  | 0.575                   | 0.262   | 0.025 |
| Triglycerides         | -0.029 | 0.808 | -0.038 | 0.762 | -0.053 | 0.668 | 0.106  | 0.406 | 0.119        | 0.288 | 0.139  | 0.212                   | -0.419  | 0.002 |
| Cholesterol           | -0.131 | 0.280 | -0.085 | 0.511 | 0.176  | 0.138 | -0.095 | 0.444 | 0.268        | 0.015 | -0.441 | 3.359·10 <sup>-05</sup> | -0.407  | 0.001 |
| LDL Cholesterol       | -0.032 | 0.795 | -0.033 | 0.798 | 0.201  | 0.085 | -0.059 | 0.635 | 0.293        | 0.008 | -0.363 | 0.001                   | -0.327  | 0.014 |
| HDL Cholesterol       | -0.071 | 0.561 | -0.068 | 0.597 | 0.149  | 0.217 | -0.193 | 0.113 | -0.111       | 0.323 | -0.554 | 6.733·10 <sup>-08</sup> | -0.021  | 0.884 |
| Apo-A1                | -0.152 | 0.206 | -0.207 | 0.102 | 0.027  | 0.826 | -0.292 | 0.010 | -0.066       | 0.553 | -0.541 | 1.530·10 <sup>-07</sup> | -0.181  | 0.189 |
| Apo-A2                | -0.118 | 0.333 | -0.201 | 0.123 | 0.006  | 0.963 | -0.232 | 0.049 | 0.062        | 0.581 | -0.370 | 0.001                   | -0.342  | 0.008 |
| Apo-B100              | 0.009  | 0.942 | -0.018 | 0.890 | 0.226  | 0.050 | 0.024  | 0.845 | 0.356        | 0.001 | -0.317 | 0.004                   | -0.369  | 0.003 |

ECOG PS: Eastern Cooperative Oncology Group Performance Status; pT: primary tumor size; N: regional lymph nodes

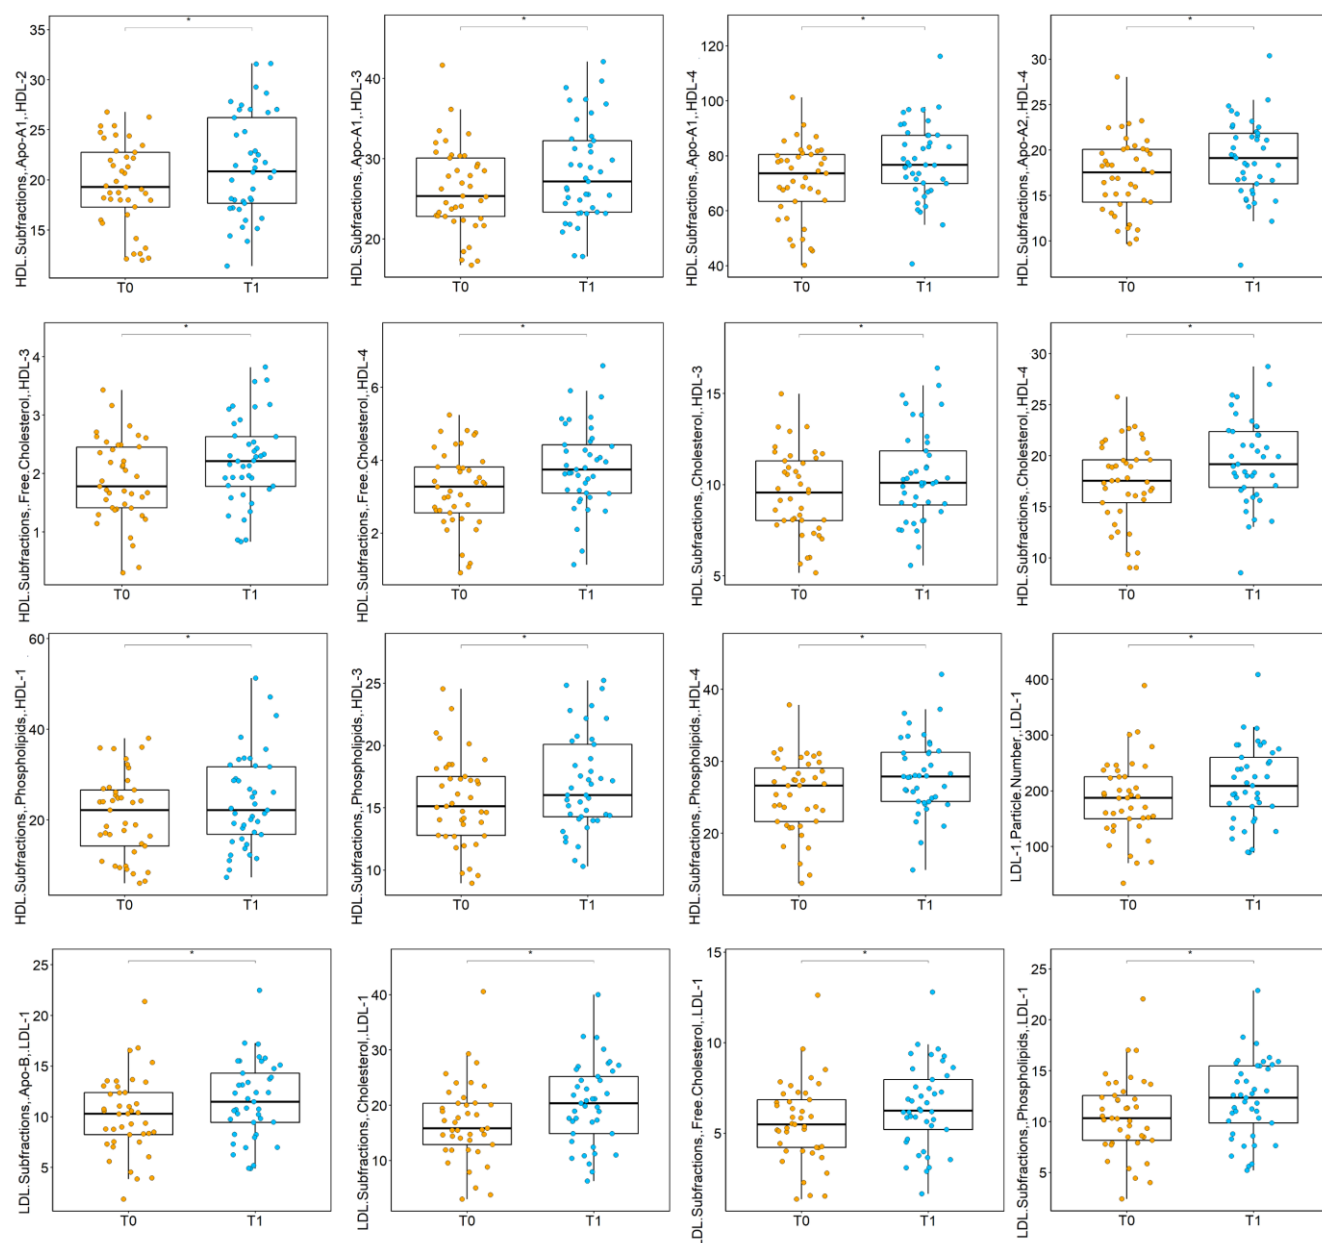

**Figure S1.** Boxplots of the statistically significant lipoproteins-related parameters discriminating of CRC patients at t0 (orange) and t1 (turquoise);  $p$ -values obtained using Wilcoxon signed-rank test and adjusted for FDR are reported. \*\*\*  $p < 0.001$ ; \*\*  $p < 0.01$ ; \*  $p < 0.05$ .
